# Supplementary material for: Tail reconnection in the global magnetospheric context: Vlasiator first results
Source: Copernicus journal article supplement (doi:10.5194/angeo-35-1269-2017), 2017-11-28
Supplement: Supplementary file [file angeo-35-1269-2017-supplement-title-page.pdf › angeo-35-1269-2017-supplement-title-page.pdf]

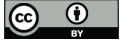

## *Supplement of*

# **Tail reconnection in the global magnetospheric context: Vlasiator first results**

**Minna Palmroth et al.**

*Correspondence to:* Minna Palmroth ([minna.palmroth@helsinki.fi](mailto:minna.palmroth@helsinki.fi))

- [angeo-35-1269-2017-supplement-title-page.pdf](#)
- movies
  - .DS\_Store
  - S1.mp4
  - S2.mp4

The copyright of individual parts of the supplement might differ from the CC BY 4.0 License.
